# Supplementary material for: Absorption Characteristics of Vertebrate Non-Visual Opsin, Opn3
Source: PubMed Central journal article supplement (PMC4988782; doi:10.1371/journal.pone.0161215), 2016-08-17
Supplement: pone.0161215.s001.pdf [file pone.0161215.s001.pdf]

Third intracellular loop

|                  |     |                                                                             |     |
|------------------|-----|-----------------------------------------------------------------------------|-----|
| Zebrafish Opn3   | 198 | <b>PVGVMVYCYG</b> NILYTVKMLRS-----IQDLQTVQTIKILRYEKKVA <b>VMFLMMISCF</b>    | 248 |
| Pufferfish Opn3  | 196 | <b>PVGIMIYCYG</b> NILYAVQMIRS-----IQDLQTVQIIKILRYEKKV <b>VMFFLMISCF</b>     | 246 |
| Anole Opn3       | 219 | <b>PVGIMAYCYG</b> HILHAIRMLRC-----VEDLQSIQVIKILRYEKKVA <b>KMCFLMVTF</b>     | 269 |
| Chicken Opn3     | 207 | <b>PVVIMAYCYG</b> HILYAVRMLRC-----VEDFQTSQVIKLLKYEKKVA <b>KMCFLMISTF</b>    | 257 |
| Mouse Opn3       | 212 | <b>PVGIIAHCYG</b> HILYSVRMLRC-----VEDLQTIQVIKMLRYEKKVA <b>KMCFLMAFVF</b>    | 262 |
| Human Opn3       | 214 | <b>PLGVIAHCYG</b> HILYSIRMLRC-----VEDLQTIQVIKILKYEKKLA <b>KMCFLMIFTF</b>    | 264 |
| Mosquito Opn3    | 200 | <b>PLIVIVYSYT</b> NIIVYMRNSA-----RVGRINRAEQRVT <b>SMVAVMIVAF</b>            | 243 |
| Spider rhodopsin | 226 | <b>PLFIIIICYA</b> FIVMQVAHEKSLREQAKMNIKSLRSNEDNKKASAEFRLA <b>KVAFMTICCW</b> | 286 |
| Bovine rhodopsin | 215 | <b>PLIVIFFCYG</b> QLVFTVKEAAA-----QQQESATTQKAEKEVTR <b>RMVIIMVIAF</b>       | 261 |

Opsin-JiL3 mutants

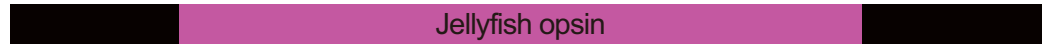

|                 |     |                                                                                                                  |     |
|-----------------|-----|------------------------------------------------------------------------------------------------------------------|-----|
| Jellyfish opsin | 184 | <b>PVLLMVATYV</b> <b>LVQ</b> GEMKNMRG <b>RAAQ</b> ----- <b>LFGSESE</b> AALK <b>NIKA</b> EKR <b>HTRL</b> VFVMILSF | 238 |
|-----------------|-----|------------------------------------------------------------------------------------------------------------------|-----|

S1 Fig Sugihara et al.
