# Supplementary material for: Absorption Characteristics of Vertebrate Non-Visual Opsin, Opn3
Source: PubMed Central journal article supplement (PMC4988782; doi:10.1371/journal.pone.0161215), 2016-08-17

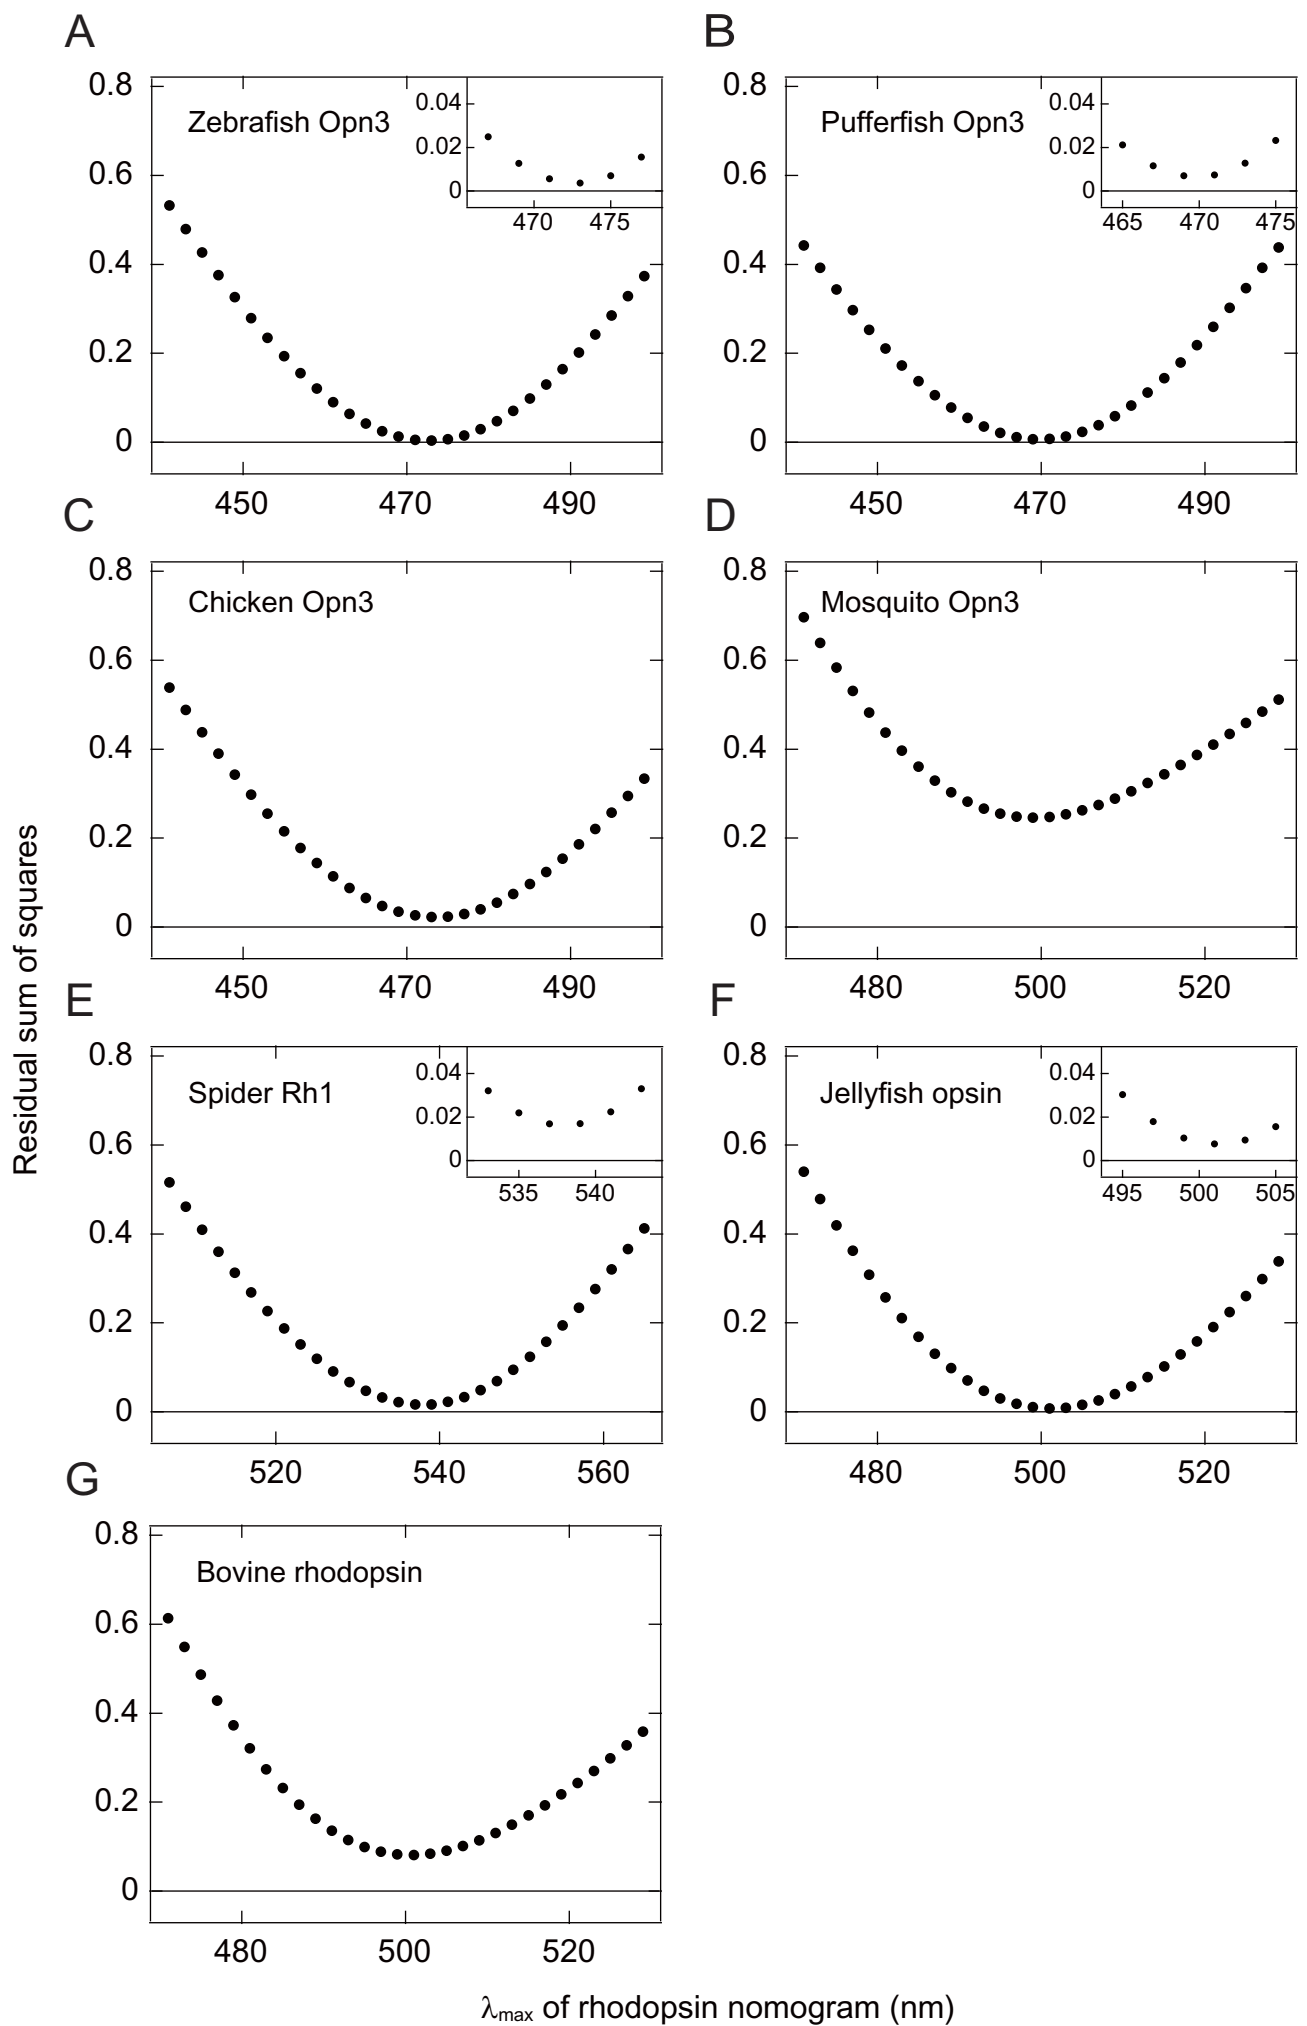

Supplement: pone.0161215.s004.pdf [file pone.0161215.s004.pdf]
